# Supplementary material
Source: Springer Nature journal article supplement (https://www.springermedizin.de/resource/supplementary/12943_2013_1510_MOESM3_ESM.pdf/9552302)
Supplement: MOESM3 [file 9552302]

## Supplementary figure 2.

Goblet cell lineage induction in mouse organoid culture upon DBZ treatment
